# Supplementary material for: Rigidity/flexibility competition in organic/iodoargentate hybrids: a combined experimental and theoretical study
Source: Royal Society of Chemistry journal article supplement (doi:10.1039/c2ce26640g), 2012-12-21
Supplement: c2ce26640g.pdf [file c2ce26640g.pdf]

## Rigidity/Flexibility Competition in Organic/Iodoargentate Hybrids:

### A Combined Experimental and Theoretical Study

Hao-Hong Li<sup>a,b\*</sup>, Yuan-Yuan Xing<sup>a</sup>, Zhao-Xun Lian<sup>c</sup>, An-Wen Gong<sup>a</sup>, Hong-Yan Wu<sup>a</sup>, Yi Li<sup>a,b</sup>,

Zhi-Rong Chen<sup>a,b\*</sup>

<sup>a</sup>College of Chemistry and Chemical Engineering, Fuzhou University, Fuzhou, Fujian, 350108, P. R. China

<sup>b</sup>State Key Laboratory Breeding Base of Photocatalysis, Fuzhou University, Fuzhou, Fujian, 350002, P. R. China

<sup>c</sup>School of Chemistry and Chemical Engineering, Henan Institute of Science and Technology, Xinxiang, Henan, 453003, P. R. China

\*Corresponding authors, E-mail: [lihh@fzu.edu.cn](mailto:lihh@fzu.edu.cn) and [zrchen@fzu.edu.cn](mailto:zrchen@fzu.edu.cn)

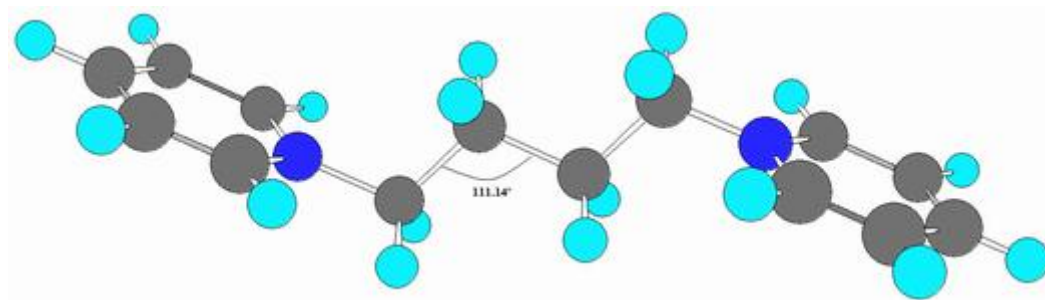

Fig. s1 Geometry of BPB<sup>2+</sup> optimized at B3LYP/6-31g(d) level

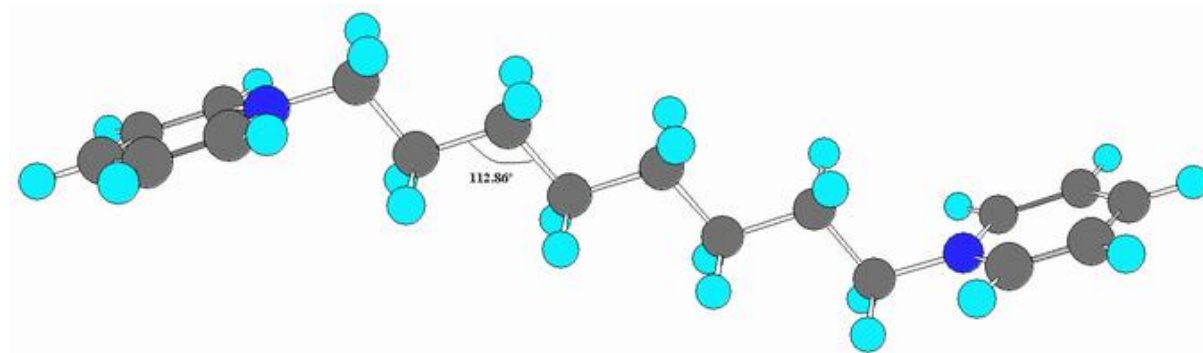

Fig. s2 Geometry of BPO<sup>2+</sup> optimized at B3LYP/6-31g(d) level

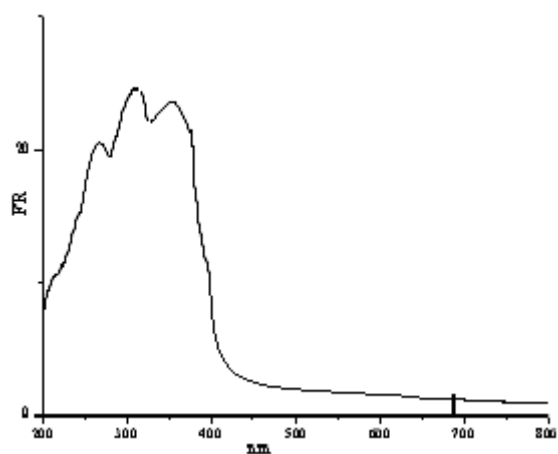

(a)

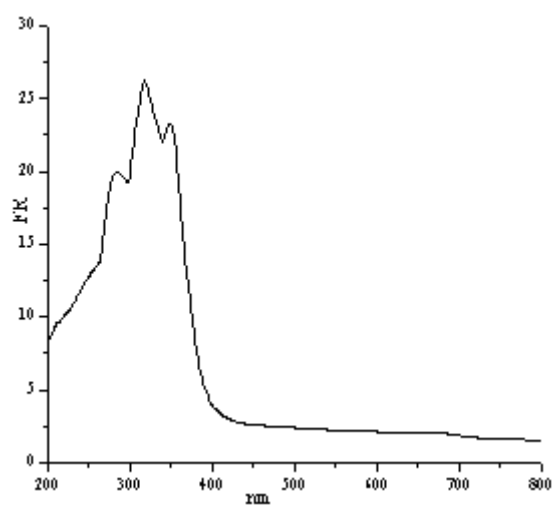

(b)

Fig.s3 UV-Vis absorption spectra of 1 (a) and 2(b)
